2                   **Influenza-associated hospitalisation and mortality rates**  
3                   **among global Indigenous populations; a systematic**  
4                   **review and meta-analysis**

5                   *Juliana M. Betts, Aaron L. Weinman, Jane Oliver, Maxwell Braddick, Siyu Huang, Matthew*  
6                   *Nguyen, Adrian Miller, Steven Y.C. Tong, Katherine B. Gibney*

7  
8                   **Department of Infectious Diseases, University of Melbourne at the Peter Doherty**  
9                   **Institute for Infection and Immunity, Victoria 3000 Australia**

10                   (JM Betts MPH, AL Weinman BSc, J Oliver PhD, M Braddick MBBS, S Huang  
11                   BBioMedSc, M Nguyen BSc, SYC Tong PhD, KB Gibney PhD)

12                   **School of Public Health and Preventive Medicine, Monash University, Melbourne,**  
13                   **Victoria, Australia (JM Betts)**

14                   **Melbourne Medical School, University of Melbourne (S Huang)**

15                   **Centre for Indigenous Health Equity Research, Central Queensland University,**  
16                   **Queensland, Australia (A Miller PhD)**

17                   **Victorian Infectious Disease Service, The Royal Melbourne Hospital at the Peter**  
18                   **Doherty Institute for Infection and Immunity, Victoria 3000 Australia (M Braddick, S**  
19                   **Tong, K Gibney)**

20                   Correspondence to: Dr Katherine Gibney, Department of Infectious Diseases, The Peter  
21                   Doherty Institute for Infection and Immunity, University of Melbourne, Melbourne, Victoria,  
22                   Australia [katherine.gibney@unimelb.edu.au](mailto:katherine.gibney@unimelb.edu.au)

23  
24  
25  
26  
27  
28  
29  
30  
31  
32                   **NOTE: This preprint reports new research that has not been certified by peer review and should not be used to guide clinical practice.**

## 33 **Abstract**

34

### 35 *Background*

36 More than 50 million influenza infections and over 100,000 deaths from influenza occur  
37 annually. While Indigenous populations experience an inequitable influenza burden, the  
38 magnitude of this inequity has not previously been estimated on a global scale. This study  
39 compared rates of influenza-associated hospitalisation and mortality between Indigenous and  
40 non-Indigenous populations globally.

### 41 *Methods*

42 A systematic review and meta-analysis was conducted including literature published prior to  
43 13 July 2021. Eligible articles either reported a rate ratio (RR) comparing laboratory-  
44 confirmed influenza-associated hospitalisation and/or mortality between an Indigenous  
45 population and a corresponding benchmark population, or reported sufficient information for  
46 this to be calculated using publicly available data. Findings were reported by country/region  
47 and pooled by country and period (pandemic/seasonal) when multiple studies were available  
48 using a random-effects model. The  $I^2$  statistic assessed variability between studies.

### 49 *Results*

50 Thirty-six studies (moderate/high quality) were included; all from high or high-middle  
51 income countries. The pooled influenza-associated hospitalisation RR (HRR) for indigenous  
52 compared to benchmark populations was 5.7 (95% CI: 2.7–12.0) for Canada, 5.2 (2.9–9.3)  
53 for New Zealand, and 5.2 (4.2–6.4) for Australia. Of the Australian studies, the pooled HRR  
54 for seasonal influenza was 3.1 (2.7–3.5) and for pandemic influenza was 6.2 (5.1–7.5).  
55 Heterogeneity was slightly higher among studies of pandemic influenza than seasonal

56 influenza. The pooled mortality RR was 4.1 (3.0–5.7) in Australia and 3.3 (2.7–4.1) in the  
57 United States.

58 *Conclusions*

59 Ethnic inequities in severe influenza persist and must be addressed by reducing disparities in  
60 the underlying determinants of health. Influenza surveillance systems worldwide should  
61 include Indigenous status to determine the extent of the disease burden among Indigenous  
62 populations. Ethnic inequities in pandemic influenza illustrate the need to prioritise  
63 Indigenous populations in pandemic response plans.

64

## 65 **Introduction**

66 Influenza viruses and their pandemic potential remain a persistent threat to global health in  
67 the 21<sup>st</sup> century. Typically manifesting as fever and cough, influenza can rapidly progress to  
68 more severe illness resulting in hospitalisation and death, especially among children and the  
69 elderly.<sup>(1)</sup> The Global Burden of Disease Study estimated that in 2017 influenza caused 54.5  
70 million lower respiratory tract infections; 8.2 million of which were severe and around  
71 145,000 subsequent deaths occurred.<sup>(2)</sup> Indigenous populations, in particular, are known to  
72 be inequitably overrepresented in the influenza disease burden<sup>(3, 4)</sup> although a systematic  
73 review demonstrating the extent of this inequity on a global scale is lacking. A greater  
74 understanding of those populations most at-risk of severe influenza is required to direct  
75 prevention and intervention strategies effectively, in keeping with the Public Health Research  
76 Agenda for Influenza developed by the World Health Organization (WHO) Global Influenza  
77 Program.<sup>(5)</sup>

78

79 The term ‘Indigenous’ cannot be universally defined, due to the significant diversity present  
80 among the 370 million Indigenous people living in over 70 countries throughout the world  
81 today.<sup>(6)</sup> However, the term is generally interpreted to mean peoples who have a “historical  
82 continuity with pre-invasion and pre-colonial societies”,<sup>(7)</sup> with communities having the  
83 right to self-identify as Indigenous “in accordance with their customs and traditions”.<sup>(8)</sup>

84

85 In general, Indigenous populations throughout the world are known to experience higher rates  
86 of ill-health compared with non-Indigenous populations, although there is a lack of quality  
87 data from low and middle-income countries.<sup>(9)</sup> Anderson *et al.* demonstrated that while  
88 Indigenous groups from a range of countries typically experience shorter life expectancy,

89 higher infant and maternal mortality rates, lower levels of education and higher rates of  
90 chronic disease when compared with corresponding benchmark populations, this is not  
91 uniformly the case, and the magnitude of the discrepancy differs based on the study  
92 setting.(10)

93

94 Analyses of historical data from the Spanish influenza pandemic of 1918 indicate that  
95 Indigenous populations were disproportionately affected throughout the United States,  
96 Canada, Nordic countries and the Pacific, with estimated mortality rates ranging from 90%  
97 among Alaskan Inuits to 1·3% among native Hawaiians.(4) These rates are significantly  
98 higher than the estimated mortality rates for the corresponding non-Indigenous populations  
99 (ranging from 0·20% to 0·79%).(4)

100

101 More advanced diagnostic technologies such as reverse transcription polymerase chain  
102 reaction (PCR) testing has enabled a high level of diagnostic accuracy to be achieved when  
103 testing for influenza in modern times, as was the case during the 2009 H1N1 pandemic  
104 (2009pH1N1). As demonstrated in a multi-country comparison by La Ruche *et al.*,  
105 2009pH1N1-associated hospitalisation and mortality among Indigenous populations was  
106 significantly higher when compared to benchmark populations in Canada (hospitalisation  
107 relative risk RR 5·7, mortality RR 3·4), the United States (hospitalisation RR 4·1, mortality  
108 RR 4·3), Brazil (hospitalisation RR 4·4), Australia (hospitalisation RR 7·7, mortality RR  
109 5·1), New Zealand (hospitalisation RR 3·0) and New Caledonia (mortality RR 5·3).(3)

110 Almost one-hundred years following the Spanish influenza pandemic, the inequity in  
111 influenza disease burden with regard to Indigenous status remains stark.

112

113 It is therefore timely that a systematic review taking a global approach to the characterisation  
114 of influenza among Indigenous populations in both pandemic and inter-pandemic years be  
115 undertaken. The present study aimed to compare the rates of influenza-associated  
116 hospitalisation and mortality between Indigenous and non-Indigenous populations globally.  
117 This review has significant implications for informing vaccination policy, enhancing  
118 pandemic preparedness and addressing ethnic inequity.

119

120

121

122

123

124

125

126

127

128

129

130

## 131 **Methods**

### 132 **Search strategy and selection criteria**

133 A systematic review and meta-analysis of literature published prior to 13 July 2021 was  
134 undertaken following the guidelines outlined in the PRISMA statement.(11) The review was  
135 registered with the International Prospective Register of Systematic Reviews (PROSPERO)  
136 prior to data extraction (Registration No.: CRD42017075598). The following electronic  
137 databases were searched; Pubmed, Medline, Embase, Cochrane Central Register of  
138 Controlled Trials and CINAHL. Reference lists of studies were also reviewed for additional  
139 relevant papers.

140

141 Based on the nominated Indigenous groups outlined by Anderson *et al.*,(10) the following  
142 search terms were used;

143 Indigenous OR Aborigin\* OR native OR trib\* OR First nation\* OR Maori OR Inuit\* OR Indians, North  
144 American OR (Torres Strait Island\*) OR Dai OR Tibet\* OR Mon OR Sherpa OR Rai OR Magar OR Tamang  
145 OR FATA OR Sami OR Nenet\* OR Baka OR Pygm\* OR Maasai OR Ijaw OR Fulani OR Metis OR Mapuche  
146 OR Kuna Yala OR (Embera Wounaan) OR Ngabe Bugle

147 AND

148 Influenza

149 AND

150 hospital\* OR mortality OR death OR fatal\*

151

152 Searches were undertaken by JB up to 13 June 2017 and were updated by JO from June 2017  
153 to 13 July 2021. Selected data fields were abstracted and imported into the systematic review

154 software Covidence.(12) Two independent reviewers assessed each record (JB, AW/MN for  
155 searches conducted to 13<sup>th</sup> June 2017 and JO, CH for the updated searches) using a two-step  
156 screen. First, articles were screened by title and abstract, and second by full text review.  
157 Disagreements were arbitrated by a third independent reviewer to reduce errors (KG).

158

159 To be included, studies had to be published in English, and contain data from primary  
160 observational research. Included studies had an extractable parameter such that a rate ratio  
161 was reported or could be calculated comparing influenza-associated hospitalisation and/or  
162 mortality rates between the Indigenous population and the corresponding benchmark  
163 population of a particular country or region. We included only studies with laboratory-  
164 confirmed influenza, or those deemed most likely to have used laboratory confirmation based  
165 on the study context. This was to ensure influenza alone was being studied, rather than other  
166 diseases with similar clinical presentations, such as pneumonia or other respiratory tract  
167 infections.

168

169 Single hospital-based studies that did not service states or regions with available denominator  
170 data, review articles, conference abstracts and studies which included cases based upon a  
171 clinical diagnosis of influenza alone were excluded. There were no timeframe or setting  
172 exclusions.

173

#### 174 **Data Analysis**

175 Microsoft Excel was used to extract relevant data. This was performed by JB or JO and  
176 verified by a second reviewer.



177

178 For included studies, abstracted data fields (where available) were: country and setting,  
179 nominated Indigenous population and comparison benchmark population, study period, age  
180 group, vaccination status, comorbidities, influenza strain and whether seasonal or pandemic,  
181 Indigenous and benchmark population hospitalisation rates, hospitalisation rate ratio,  
182 Indigenous and benchmark population mortality rates, mortality rate ratio, 95% confidence  
183 intervals, case fatality rates and sample size. Not all studies reported all these data, including  
184 some that did not report 95% confidence intervals for rates and rate ratios.

185

186 Two reviewers (MB and SH) independently assessed individual study quality and risk of bias  
187 using the Joanna Briggs Institute (JBI) critical appraisal checklist for cohort studies.

188 Discrepancies in assessment were adjudicated by a third reviewer (KG).

189

190 Hospitalisation and mortality rates and rate ratios were reported and/or calculated based upon  
191 the number of events divided by the population at risk and presented per 100,000 person-  
192 months to enable comparison between studies that covered varying time periods. The rate  
193 ratio of influenza-associated hospitalisation and death in Indigenous compared to non-  
194 Indigenous populations for each country/region was reported and/or calculated. A global  
195 pooled rate ratio was not estimated due to hypothesised data heterogeneity and because each  
196 country and Indigenous group is distinct, limiting the impact of such a measure. However,  
197 where there were multiple studies originating from one country, a pooled rate ratio was  
198 calculated overall, and by pandemic or seasonal strain, if the necessary numerator and  
199 denominator figures were available. If not specified in the study, denominators were obtained  
200 from relevant, publicly available census data, which may have altered the rate ratios from

201 those published in the original study. Pooled estimates, 95% confidence intervals and forest  
202 plots were generated using the statistical software STATA 15.1.<sup>(13)</sup> A random effects model  
203 was chosen based upon the significant differences between studies in terms of geographical  
204 location and population. 95% confidence intervals (95% CI) that did not include the value 1  
205 were considered statistically significant. The  $I^2$  estimate of heterogeneity was used to assess  
206 variability between studies.

207

### 208 **Role of the funding source**

209 There was no funding source for this study.

210

211

212

213

214

## 215 **Results**

216 **Figure 1** depicts numbers of articles screened, assessed for eligibility and included in the  
217 review. Thirty-six studies were included for data extraction and are summarised in  
218 **Supplementary Material – Table 1**. Of the included studies, 15 (42%) were from  
219 Australia,(14-28) 10 (28%) were from the United States of America (USA),(29-38) six (17%)  
220 were from New Zealand,(39-44) and four (11%) were from Canada.(45-48) Only one (3%)  
221 was from a high-middle income country (Brazil),(49) and there were no included studies  
222 from low-middle or low-income countries.

223

224 Of the included studies, 21 (58%) had extractable data only for influenza-associated  
225 hospitalisation(14-18, 22, 23, 31, 33, 34, 38-44, 46-49) and five (14%) had extractable data  
226 only for influenza-associated mortality.(21, 29, 30, 35, 36) There were 10 studies (28%) with  
227 extractable data for both hospitalisation and mortality.(19, 20, 24-28, 32, 37, 45) Nearly three  
228 quarters of included studies (n=26, 72%) analysed hospitalisations and/or deaths during the  
229 2009pH1N1,(17-20, 25-27, 29-33, 35-41, 44-49) while seven (19%) analysed hospitalisations  
230 and/or deaths from seasonal influenza(14, 15, 22, 23, 34, 42, 43) and four (11%) covered both  
231 seasonal and pandemic periods.(16, 21, 24, 28) Of the 36 included studies, 28 (78%) had no  
232 age limitations,(17-32, 34-40, 44-46, 48, 49) while others considered children,(14-16, 33, 43)  
233 adults(41) or women of reproductive age.(42, 47) Data used to calculate hospitalisation and  
234 mortality rates is provided in **Supplementary Material Table 2**.

235

236 **Figure 1: Flow diagram of included studies**

237

238 The JBI critical appraisal tool findings are summarised in **Supplementary Material – Table**  
239 **3 and Table 4**. Indigenous and non-Indigenous groups were assessed from the same  
240 population with the exception of one study, which compared the Indigenous population in  
241 Alaska with the non-Indigenous population in the rest of the USA, indicating a higher risk of  
242 bias. (33) There was heterogeneity in the methods for assessing Indigenous status. Studies  
243 using maternal identification and population projections to identify Indigenous cases, as  
244 opposed to patient identification, were classified as having an unclear risk of bias. (14, 16,  
245 21, 25, 26) Studies using ICD codes rather than laboratory data to identify influenza  
246 infections were also classified as unclear in category 6 of the JBI tool. (14, 22-24, 33-35)  
247 Category 4 of the JBI tool (regarding identification of confounding factors) identified a low  
248 risk of bias for 30/36 studies. Category 5 of the JBI tool (regarding strategies to address  
249 confounding factors) identified 25/36 studies with a low risk of bias. Using the composite of  
250 the JBI critical appraisal tool, no studies assessed were classified as having an overall high  
251 risk of bias.

252

253 Influenza-associated hospitalisation rates among Indigenous populations ranged from 0.8  
254 hospitalisations per 100,000 person-months among Native Americans and Alaska Natives in  
255 the United States during the first wave (Spring/Summer) of the 2009pH1N1,(32) to 89.7  
256 hospitalisations per 100,000 person-months among Aboriginal and Torres Strait Islander  
257 peoples in Australia during the 2009pH1N1 (**Table 1**).(17)

**Table 1: Overall influenza-associated hospitalisation rates (HR) and hospitalisation rate ratios (HRR) (crude rates unless otherwise specified) for Indigenous peoples compared with a benchmark population**

| Author, year                                    | Country (region); age-group                                                                                         | Study Period                  | Indigenous HR<br>(per 100,000 person-<br>months) | Benchmark HR<br>(per 100,000 person-<br>months) | HRR              | 95% Confidence<br>Interval (HRR) | n                  |
|-------------------------------------------------|---------------------------------------------------------------------------------------------------------------------|-------------------------------|--------------------------------------------------|-------------------------------------------------|------------------|----------------------------------|--------------------|
| Baker et al, 2009(39)                           | New Zealand (nation-wide); all ages                                                                                 | May - August 2009             | 10.8*                                            | 3.5*                                            | 3.0*             | 2.9 - 3.2                        | 972                |
| Bandaranayake et al, 2011(40)                   | New-Zealand (nation-wide); all ages                                                                                 | January - October 2010        | -                                                | -                                               | 1.8              | 1.6 - 2.0                        | 732                |
| Dee et al, 2010(41)                             | New-Zealand (Hutt Hospital); adults >18 years                                                                       | June - July 2009              | 81.3                                             | 15.7                                            | 5.2              | 2.7 - 9.8                        | 54                 |
| Prasad et al, 2019(42)                          | New Zealand (Auckland); women of reproductive age                                                                   | 2012 - 2015                   | 16.9                                             | 4.7                                             | 3.6              | 2.5 - 5.1                        | 123                |
| Prasad et al, 2020(43)                          | New Zealand (Auckland); infants < 1 year                                                                            | 2014 - 2016 (winter months)   | 38.3**                                           | 3.5**                                           | 11.1**           | 4.4 - 28.1                       | 44                 |
| Verrall et al, 2010(44)                         | New Zealand (Wellington, Hutt Valley); all ages                                                                     | June - August 2009            | 42.7*                                            | 8.5*                                            | 5.0*             | -                                | 229                |
| Carville et al, 2007(14)                        | Australia (Western Australia); age 0-2 years                                                                        | 1990 - 2000                   | 5.1                                              | 1.3                                             | 3.9              | 3.1 - 4.8                        | 520                |
| D'Onise et al, 2008(15)                         | Australia (South Australia); all ages                                                                               | 1996 - 2006                   | 13.5 <sup>‡</sup>                                | 5.2 <sup>‡</sup>                                | 2.6              | -                                | 649                |
| Fathima et al, 2018(16)                         | Australia (Western Australia); age <16 years                                                                        | 2000 - 2012 (Influenza A)     | 2.7                                              | 0.4                                             | 7.2              | 5.5 - 9.4                        | 228                |
|                                                 |                                                                                                                     | 2001 - 2012 (Influenza B)     | 0.9                                              | 0.1                                             | 11.0             | 6.5 - 18.9                       | 54                 |
|                                                 |                                                                                                                     | 2000 - 2012 (Influenza A + B) | 2.1 <sup>#</sup>                                 | 0.3 <sup>#</sup>                                | 7.9 <sup>#</sup> | 6.2 - 10.1                       | 282                |
| Flint et al, 2010(17)                           | Australia (Northern Territory Top End); all ages                                                                    | June - August 2009            | 89.7                                             | 9.7                                             | 9.3              | -                                | 161                |
| Goggin et al, 2011(18)                          | Australia (Western Australia); all ages                                                                             | June - August 2009            | 10.6 <sup>†</sup>                                | 1.7 <sup>†</sup>                                | 6.4 <sup>†</sup> | 3.8 - 10.7                       | 100                |
| Harris et al, 2010(19)                          | Australia (North Queensland); all ages                                                                              | May - August 2009             | 37.1                                             | 4.7                                             | 7.9              | 4.7 - 13.2                       | 61                 |
| Kelly et al, 2009(20)                           | Australia (nation-wide); all ages                                                                                   | May - October 2009            | 25.1                                             | 3.2                                             | 7.8              | 7.2 - 8.4                        | 4 833              |
| Menzies et al, 2004(22)                         | Australia (nation-wide); all ages                                                                                   | July 1999 - June 2002         | 4.1*                                             | 1.4*                                            | 2.9* (2.7)       | 2.5 - 3.0                        | 10 313             |
| Menzies et al, 2008(23)                         | Australia (New South Wales, the Northern Territory, Queensland, South Australia and Western Australia); all ages    | July 2002- June 2005          | 3.2*                                             | 1.3*                                            | 2.3* (3.0)       | 2.7 - 3.2                        | 7 378              |
| Naidu et al, 2013(24)                           | Australia (New South Wales, Northern Territory, Queensland, South Australia, Victoria, Western Australia); all ages | July 2005- June 2010          | 8.1*                                             | 1.8*                                            | 4.6*             | 4.4 - 4.9                        | 22 998             |
| New South Wales Public Health Network, 2009(25) | Australia (New South Wales); all ages                                                                               | May - August 2009             | 17.3 <sup>¶</sup>                                | 4.4 <sup>¶</sup>                                | 4.0              | 3.2 - 4.9                        | 1 214              |
| Pennington et al, 2018(26)                      | Australia (nation-wide); all ages                                                                                   | January - December 2009       | 10.5                                             | 1.7                                             | 6.2              | 5.7 - 6.7                        | 5 085              |
| Rudge et al, 2010(27)                           | Australia (New South Wales); all ages                                                                               | April - August 2009           | 7.8                                              | 1.9                                             | 4.2 (3.2*)       | 3.5 - 5.3                        | 1 131              |
| Weinman et al, 2020(28)                         | Australia (Northern Territory); all ages                                                                            | 2007 - 2016                   | 2.0*                                             | 0.3*                                            | 6.5*             | 5.9 - 7.2                        | 2 107 <sup>∇</sup> |
| Chowell et al, 2012(31)                         | U.S.A (Maricopa County); all ages                                                                                   | April 2009 - April 2010       | -                                                | -                                               | 6.2              | 6.1 - 6.2                        | 532                |
|                                                 |                                                                                                                     | April - August 2009           | 0.8*                                             | 0.6*                                            | 1.4*             | -                                | 1 238              |
| Dee et al, 2011(32)                             | U.S.A (10 states); all ages                                                                                         | September 2009 - January 2010 | 6.5*                                             | 3.3*                                            | 2.0*             | -                                | 4 637              |
| Foote et al, 2015(33)                           | U.S.A (nation-wide); age < 1 year                                                                                   | April 2009 - March 2010       | 82.5                                             | 27.5                                            | 3                | -                                | -                  |
| Gounder et al, 2014(34)                         | U.S.A (IHS Contract Health Service Delivery Area counties (Indigenous) 13 states (benchmark)); all ages             | 2001-2008                     | 1.6 <sup>‡</sup>                                 | 1.3 <sup>‡</sup>                                | 1.2              | -                                | -                  |
| Thompson et al, 2011(37)                        | U.S.A (New Mexico); all ages                                                                                        | September 2009 - January 2010 | 19.2*                                            | 7.3*                                            | 2.6* (2.2)       | 1.8 - 2.6                        | 926                |

|                                  |                                                                                    |                          |        |       |        |             |       |
|----------------------------------|------------------------------------------------------------------------------------|--------------------------|--------|-------|--------|-------------|-------|
| Wenger et al, 2011(38)           | U.S.A (Alaska); all ages                                                           | September - October 2009 | 28     | 7     | 4      | -           | 96    |
| Helferty et al 2010(45)          | Canada (nation-wide); all ages                                                     | April 2009 - April 2010  | 3.6†   | 1.4†  | 2.5†   | 2.3 - 2.8   | 6 091 |
| Mostaço-Guidolin et al, 2013(46) | Canada (Manitoba); all ages                                                        | May - August 2009        | 43.7†  | 2.9†  | 14.8†  | 11.3 - 19.4 | 213   |
|                                  |                                                                                    | October - January 2010   | 10.3†  | 4.1†  | 2.5†   | 1.7 - 3.8   | 166   |
| Rolland-Harris et al, 2012(47)   | Canada (nation-wide, excluding Ontario and Nova Scotia); women of reproductive age | April 2009 - April 2010  | 4.5¶   | 1.1¶  | 4.0¶   | 3.4 - 4.8   | 986   |
| Zarychanski et al, 2010(48)      | Canada (Manitoba); all ages                                                        | April - September 2009   | 22.8†λ | 1.4†λ | 16.1†λ | 12.0 - 21.7 | 178   |
| Lenzi et al, 2012(49)            | Brazil (Paraná); all ages                                                          | January – December 2009  | 9.5β   | 2.0β  | 4.8β   | 3.2 - 6.9   | 1 911 |

258

259 \*age-standardised; † based on population data from the 2011 census(50, 51); β based on population data from the 2000 census(52); λ based on population  
260 fraction of 0.072(46); ¶ based on population data from the 2006 census(53, 54); † mean rate over study period; \*\* based on population estimates  
261 provided(43);# based on cohort size of 469 589 children(16); ∇ figures provided through personal correspondence from authors; U.S.A – United States of  
262 America

263 A consistent pattern of statistically significant higher hospitalisation rates among Indigenous  
264 populations compared to benchmark populations was demonstrated (**Table 1**). The highest  
265 ethnic disparity was observed in Manitoba, Canada during the 2009pH1N1, whereby First  
266 Nations peoples were 16.1 (95% CI: 12.0 - 21.7) times more likely to be admitted to hospital  
267 for influenza compared with other Canadians.(48) The lowest hospitalisation rate ratio (HRR)  
268 was 1.2, observed in the United States over the seasonal influenza period 2001-2008.(34)

269

270 When observing pandemic influenza alone, HRRs comparing Indigenous to benchmark  
271 populations ranged from 1.4 in the United States,(32) to 16.1 (95% CI: 12.0 - 21.7) in  
272 Canada.(48) When observing seasonal influenza alone, the highest disparity was observed  
273 among infants in Auckland, New Zealand, wherein Māori children were 11.1 (95% CI: 4.1-  
274 28.1) times more likely to be hospitalised for influenza compared with European and other  
275 children during the winter months of 2014 - 2016.(43) The lowest seasonal influenza HRR  
276 was 1.2, observed in the USA over 2001-2008.(34)

277

278 For hospitalisations, the pooled overall influenza-associated HRR (Indigenous compared  
279 with the benchmark population) was 5.7 (95% CI: 2.7 – 12.0, n=4 studies) for Canada, 5.2  
280 (95% CI: 2.9 - 9.3, n=3 studies) for New Zealand and 5.2 (95% CI: 4.2 - 6.4, n=12 studies)  
281 for Australia (**Figure 2**).

282

283 Seven studies included data on seasonal influenza-associated hospitalisation (separate from  
284 pandemic influenza)(14, 15, 22, 23, 34, 42, 43), four (57%) of which were from Australia.  
285 For the three Australian studies with sufficient information, the pooled seasonal influenza  
286 HRR (Indigenous vs benchmark population) was 3.1 (95% CI: 2.7 - 3.5) (**Figure 3**). By

287 contrast, for pandemic influenza, the pooled HRR in seven Australian studies was 6.2 (95%  
288 CI: 5.1 - 7.5). Heterogeneity was slightly higher among studies of pandemic influenza ( $I^2 =$   
289 93.7%) compared with seasonal influenza ( $I^2 = 79.1\%$ ).

290  
291 Globally, the lowest rate of influenza-associated mortality for an Indigenous population was  
292 0.03 deaths per 100,000 person-months, observed among Indigenous Australians in the  
293 Northern Territory over the period 2007- 2016 (Table 2).(28) The highest Indigenous  
294 mortality rate was 1.6 deaths per 100,000 person-months among Indigenous Australians in  
295 North Queensland during the 2009pH1N1, however this was based on only five deaths over  
296 the study period.(19)

297  
298 For benchmark populations, the lowest influenza-associated mortality rate was 0.0 deaths per  
299 100,000 person-months, observed among benchmark populations of the United States(32)  
300 and Australia.(24, 28) The highest mortality rate among benchmark populations was 0.5  
301 deaths per 100,000 person-months, observed in North Queensland, Australia during the  
302 2009pH1N1.(19) (Table 2)

303

304 **Figure 2: Overall influenza-associated hospitalisation rate ratios (HRR) for Indigenous populations**  
305 **compared with a benchmark population by country**

306

307 **Figure 3: Seasonal and pandemic influenza-associated hospitalisation rate ratios (HRR) from Australian**  
308 **studies for Indigenous populations compared with a benchmark population**

309

310



311 Mortality rate ratios (MRR) tended to be greater than 1 (see **Table 2**), indicating an  
312 inequitable impact of influenza on Indigenous populations. The lower limit of the 95% CI  
313 was >1 for 12 of the 15 (80%) included studies;(20, 24-30, 32, 35, 36, 45) crossed one for  
314 two studies;(19, 37) and was not reported for one study.(21) The greatest disparity in  
315 mortality was observed in Australia, whereby Indigenous Australians were 5·9 (95%CI: 3.6 -  
316 9.1; age-standardised 5·7) times more likely to die from 2009pH1N1 compared with non-  
317 Indigenous Australians.(24) The lowest MRR was also observed in Australia (MRR=1·1)  
318 which was an average MRR for years 2006-2013.(21) For this study, when the MRR for 2009  
319 was excluded (MRR = 3·3), the average MRR decreased to 0·79 (95% CI not provided).

**Table 2: Overall influenza-associated mortality rates (MR) and mortality rate ratios (MRR) (crude rates unless otherwise specified) for Indigenous peoples compared with a benchmark population**

| Author, year                                     | Country (region); age-group                                                                               | Study Period                  | Indigenous MR per 100, 000 person- months | Benchmark MR per 100,000 person-months | MRR        | 95% Confidence Interval   | n    |
|--------------------------------------------------|-----------------------------------------------------------------------------------------------------------|-------------------------------|-------------------------------------------|----------------------------------------|------------|---------------------------|------|
| Brooks et al, 2012 (29)                          | U.S.A (New Mexico); all ages                                                                              | January - December 2009       | 0.5 ^                                     | 0.2 ^                                  | 2.7 ^      | 1.4 - 5.3                 | 50   |
| CDC, 2009 (30)                                   | U.S.A (12 states **); all ages                                                                            | April - October 2009          | 0.5*                                      | 0.1 *                                  | 3.5 (4.0*) | 2.5 - 4.7<br>(2.9 – 5.6*) | 426  |
| Dee et al, 2011 (32)                             | U.S.A (nation-wide); < 18 years of age                                                                    | April 2009 - March 2010       | 0.1                                       | 0.0                                    | 3          | 1.2 - 6.2                 | 278  |
| Groom et al, 2014 (35)                           | USA (HIS contract health service delivery area counties); all ages                                        | January - December 2009       | 0.4                                       | 0.1                                    | 4          | 3.8 - 6.4                 | -    |
| Hennessy et al, 2016 (36)                        | USA (Alaska, Arizona, New Mexico, Oklahoma, Wyoming); all ages                                            | April - December 2009         | 0.4^                                      | 0.1^                                   | 3.8 ^      | 2.6 - 5.7                 | 145  |
| Thompson et al, 2011 (37)                        | U.S.A (New Mexico); all ages                                                                              | September 2009 - January 2010 | 0.8^                                      | 0.4^                                   | 2.0 ^      | 0.8 - 4.8                 | 35   |
| Harris et al, 2010 (19)                          | Australia (North Queensland); all ages                                                                    | May - August 2009             | 1.6                                       | 0.5                                    | 3.2        | 0.4 - 29.0                | 5    |
| Kelly et al, 2009 (20)                           | Australia (nation-wide); all ages                                                                         | May - October 2009            | 0.7                                       | 0.1                                    | 5.6        | 3.4 - 7.9                 | 186  |
| Li-Kim-Moy et al, 2016 (21)                      | Australia (Western Australia, Northern Territory); all ages                                               | 2010 - 2013                   | -                                         | -                                      | 1.1 †      | -                         | 807  |
| Naidu et al, 2013 (24)                           | Australia (New South Wales, Northern Territory, Queensland, South Australia, Western Australia); all ages | 2006 - 2010                   | 0.1¶                                      | 0.0¶                                   | 2.2¶       | 1.3 - 3.7                 | 235  |
| New South Wales Public Health Network, 2009 (25) | Australia (New South Wales); all ages                                                                     | May - August 2009             | 0.9¶                                      | 0.2¶                                   | 5.4¶       | 2.1 - 13.6                | 48   |
| Pennington et al, 2017 (26)                      | Australia (nation-wide); all ages                                                                         | January – December 2009       | 0.3                                       | 0.1                                    | 4.6        | 3.0 - 7.0                 | 188▽ |

|                          |                                          |                         |       |       |             |            |     |
|--------------------------|------------------------------------------|-------------------------|-------|-------|-------------|------------|-----|
| Rudge et al, 2010 (27)   | Australia (New South Wales); all ages    | April – August 2009     | 0.9¶  | 0.2¶  | 5.8¶ (4.5*) | 2.3 - 14.7 | 45  |
| Weinman et al, 2020 (28) | Australia (Northern Territory); all ages | 2007 - 2016             | <0.1* | <0.1* | 5.5*        | 2.4 – 12.7 | 29  |
| Helferty et al 2010 (45) | Canada (nation-wide); all ages           | April 2009 – April 2010 | 0.2 † | 0.1 † | 2.7†        | 1.8 - 3.8  | 288 |

321

322 \* age-standardised; ^ based on population data from the 2010 census population(55); † based on population data from the 2011 census(51); ¶

323 based on population data from the 2006 census(53); † mean over several years; \*\* Alabama, Alaska, Arizona, Michigan, New Mexico, North

324 Dakota, Oklahoma, Oregon, South Dakota, Utah, Washington, Wyoming; □ figures provided through personal correspondence from authors;

325 U.S.A – United States of America

326 The pooled influenza-associated MRR (Indigenous vs. benchmark populations) was 4.1 (95%  
327 CI: 3.0 - 5.7, n=7 studies) in Australia and 3.3 (95%CI: 2.7 - 4.1, n=5 studies) in the United  
328 States (**Figure 4**).

329 **Figure 4: Overall influenza-associated mortality rate ratios (MRR) by country for Indigenous peoples**  
330 **compared with a benchmark population**

331

332

## 333 **Discussion**

334

335 This review demonstrates that Indigenous populations from Australia, New Zealand, the  
336 USA, Canada and Brazil endure a disproportionate burden of severe influenza, in terms of  
337 hospitalisations and/or mortality, compared with corresponding benchmark populations. This  
338 was consistent across included studies, with only two studies having rate ratio confidence  
339 intervals that crossed one (both of which included small numbers of influenza deaths: n= 35  
340 and 5 respectively)(19, 37). These findings are consistent with those demonstrated by La  
341 Ruche *et al.*, who indicated consistently higher hospitalisation and mortality rates for  
342 Indigenous populations throughout the Americas and the Pacific during the first wave of the  
343 2009pH1N1.(3)

344

345 This disparity between Indigenous and non-Indigenous populations in influenza-associated  
346 hospitalisation and mortality demonstrates a significant health inequity. Health inequities are  
347 systematic, avoidable and unnecessary differences in health between groups of people which  
348 exacerbate underlying social disadvantage. (56) For many global Indigenous populations,  
349 including those from Australia, Canada, New Zealand, the United States and Brazil, the  
350 experience of colonialism is the common factor driving health inequities. (58) While  
351 particular circumstances differ between populations, the effects of violent dispossession from  
352 traditional lands, policies of exclusion and ongoing experiences of racism and discrimination,  
353 particularly within the healthcare sector, continue to unjustly manifest in worse health  
354 outcomes for Indigenous peoples.(57-59)

355

356 Our findings from Australian studies demonstrate that the observed disparity between  
357 Indigenous and benchmark populations was more pronounced during 2009pH1N1 than with  
358 seasonal strains (HRRs 6·2; 95% CI: 5·1 - 7·5 and 3·1; 95% CI: 2·7 - 3·5 respectively). This  
359 is supported by the finding that the lowest rate ratios for both hospitalisation and mortality  
360 were observed among studies that included seasonal influenza periods.(21, 34) The reason for  
361 this difference is not clear, however heterogeneity between the included studies was high,  
362 limiting the reliability of the pooled estimates. One possible explanation is differing  
363 demographic profiles between Indigenous and benchmark populations. Indigenous  
364 populations in Australia, Canada, New Zealand and the United States are younger compared  
365 to corresponding benchmark populations.(51, 60-62) The 2009 influenza pandemic had a  
366 disproportionate effect on younger people, with the highest rates of notified disease among  
367 people aged 18-64 years, followed by children and adolescents aged 0-17 years.(63) In  
368 contrast, the majority of seasonal influenza hospitalisations and deaths occur among adults  
369 aged >65 years.(1) The age-standardisation of rates counteract this difference in population  
370 profile to an extent, although age-standardised rates were not consistently available.

371

372 No eligible studies from low- and middle-income countries were identified, apart from one  
373 study from Brazil,(49) an upper-middle income economy.(64) This, in part, reflects our  
374 inclusion criteria, which required publication in English, and laboratory-confirmation of  
375 influenza, as access to diagnostic technologies are limited in resource-poor settings.

376 However, no eligible studies were identified from a number of other high-income countries  
377 with Indigenous populations (e.g. Norway, Denmark and Sweden) where legal prohibitions  
378 on the collection of ethnicity data exist.(65) The 2015 Sustainable Development Goals  
379 emphasised the need for more robust data collection which includes disaggregation by

380 ethnicity, in order to achieve an accurate understanding of the health status of vulnerable  
381 populations to “leave no one behind”.(66)

382

383 Hospitalisation and mortality rates were obtained from surveillance data, which is open to  
384 misclassification and outcome measurement bias. A number of included studies  
385 acknowledged that several regions within their country had imperfect reporting of ethnicity  
386 among cases. Similarly the data may have failed to account for secondary complications  
387 associated with influenza (for example bacterial pneumonia), whereby laboratory  
388 confirmation of the precipitating influenza infection may not have been sought.

389 Consequently, the rates reported here likely underestimate the true extent of influenza-  
390 associated hospitalisation and mortality. Miscoding of data could have also led to missed  
391 cases of influenza, or accidental inclusion of other viruses with similar names (such as  
392 parainfluenza virus). Publication bias is also possible as studies that demonstrate a disparity  
393 between Indigenous and benchmark populations may be more likely to be published.  
394 However, for a number of the included studies, ethnic disparities were not the primary focus  
395 of the research.

396

397 The robust design of this review, in terms of its systematic approach and requirement for  
398 laboratory confirmation of influenza infection, is considered a strength. Included results are  
399 specific for influenza, rather than influenza and/or other respiratory illnesses. Previous  
400 studies, which fail to differentiate influenza from pneumonia, are generally more likely to  
401 document the effects of pneumonia as this typically accounts for 95% of undifferentiated  
402 pneumonia/influenza cases.(35) Specifically identifying influenza is worthwhile because of  
403 its unique virological properties in relation to pandemic potential and vaccine-preventability.

404

405 The disproportionate burden of influenza-associated hospitalisation and mortality among  
406 Indigenous populations is a significant global health inequity which must be addressed. The  
407 results of this review have far-reaching public health implications for global Indigenous  
408 communities as well as policy-makers, health practitioners and researchers. Efforts to reduce  
409 underlying socioeconomic inequalities, enhance health-care access, ensure appropriate and  
410 timely use of antiviral medication, and improve the design and uptake of influenza vaccines  
411 are key strategies to be considered. Moreover, the development of surveillance systems which  
412 accurately capture both influenza and ethnicity, particularly for less well represented low-  
413 and middle-income countries, are necessary to characterise the extent of the influenza disease  
414 burden among Indigenous populations globally. The findings from this review also suggest a  
415 more severe disparity occurred during pandemic periods of influenza, which emphasises the  
416 worldwide need to prioritise Indigenous populations in influenza pandemic response plans.  
417 Future research should prioritise quantifying the influenza disease burden among Indigenous  
418 populations of low and middle-income countries, as well as improving the effectiveness of  
419 influenza vaccines among Indigenous populations.

420

421

422



## 423 **Research in Context**

### 424 **Evidence before this study**

425 Numerous studies comparing the health status of Indigenous populations with benchmark  
426 populations have demonstrated poorer health outcomes generally as well as specifically for  
427 influenza. However, most studies are based upon clinical diagnoses of influenza and focus on  
428 pandemic, rather than seasonal periods. To our knowledge, no global systematic review has  
429 compared influenza-specific hospitalisation and mortality between Indigenous and  
430 benchmark populations during seasonal and pandemic periods.

### 431 **Added value of this study**

432 This study provides a robust analysis of the available evidence relating to influenza  
433 hospitalisation and mortality for Indigenous populations compared with benchmark  
434 populations. Consistent across included studies, Indigenous populations from a number of  
435 countries endure higher rates of both hospitalisation and mortality due to influenza and this  
436 disparity may be more pronounced for pandemic, rather than seasonal influenza. This  
437 systematic review also highlighted the void in research from low- and middle-income  
438 countries, where influenza surveillance systems and diagnostic capacity may be less  
439 developed.

### 440 **Implications of all the available evidence**

441 Our findings have implications for influenza management strategies at both the population  
442 and individual level. Indigenous populations should be prioritised in influenza pandemic  
443 preparedness plans particularly with regard to the availability and uptake of influenza  
444 vaccines and antiviral medications. Policy-makers and health professionals should consider  
445 the wider contextual factors impacting upon the baseline level of health in Indigenous

446 populations, and work together with Indigenous communities to achieve health equity. Future  
447 research should focus on characterising inequities between population groups in low- and  
448 middle-income countries as well as increasing the effectiveness of influenza vaccines among  
449 Indigenous populations.

450

451

452

453

## 454 **References**

- 455 1. World Health Organization. Influenza (Seasonal) - Fact Sheet 2016 [cited on:  
456 19/04/2017]. Available from: <http://www.who.int/mediacentre/factsheets/fs211/en/>.
- 457 2. Macias AE, McElhaney JE, Chaves SS, Nealon J, Nunes MC, Samson SI, et al. The  
458 disease burden of influenza beyond respiratory illness. *Vaccine*. 2021;39 Suppl 1:A6-A14.
- 459 3. La Ruche G, Tarantola A, Barboza P, Vaillant L, Gueguen J, Gastellu-Etchegorry M.  
460 The 2009 pandemic H1N1 influenza and indigenous populations of the Americas and the  
461 Pacific. *Euro surveillance : bulletin Europeen sur les maladies transmissibles = European*  
462 *communicable disease bulletin*. 2009;14(42).
- 463 4. Mamelund SE. Geography may explain adult mortality from the 1918-20 influenza  
464 pandemic. *Epidemics*. 2011;3(1):46-60.
- 465 5. World Health Organization. WHO Public Health Research Agenda For Influenza -  
466 Biannual Progress Review and Report 2010-2011. 2013 [cited on: 21/04/2017]. Available  
467 from: [http://www.who.int/influenza/resources/research/RA\\_Progress\\_Report\\_short.pdf?ua=1](http://www.who.int/influenza/resources/research/RA_Progress_Report_short.pdf?ua=1).
- 468 6. World Health Organization. Health of indigenous peoples - Fact Sheet 2007 [Cited on  
469 28/06/2017]. Available from: <http://www.who.int/mediacentre/factsheets/fs326/en/>.
- 470 7. Martinez C. Study of the problem of discrimination against indigenous populations.  
471 Geneva: United Nations; 1986.
- 472 8. United Nations. United Nations Declaration on the Rights of Indigenous Peoples 2008  
473 [1/8/2017]. Available from: [http://www.un.org/esa/socdev/unpfii/documents/DRIPS\\_en.pdf](http://www.un.org/esa/socdev/unpfii/documents/DRIPS_en.pdf).
- 474 9. Gracey M, King M. Indigenous health part 1: determinants and disease patterns. *The*  
475 *Lancet*. 2009;374(9683):65-75.
- 476 10. Anderson I, Robson B, Connolly M, Al-Yaman F, Bjertness E, King A, et al.  
477 Indigenous and tribal peoples' health (The Lancet–Lowitja Institute Global Collaboration): a  
478 population study. *The Lancet*. 2016;388(10040):131-57.
- 479 11. Moher D, Liberati A, Tetzlaff J, Altman DG, Group P. Preferred reporting items for  
480 systematic reviews and meta-analyses: the PRISMA statement. *PLoS medicine*.  
481 2009;6(7):e1000097.
- 482 12. Mavergames C. Covidence (Systematic Review Software). 2013.
- 483 13. StataCorp LLC. Stata Statistical Software: Release 15.1. College Station, TX2020.
- 484 14. Carville KS, Lehmann D, Hall G, Moore H, Richmond P, de Klerk N, et al. Infection  
485 is the major component of the disease burden in aboriginal and non-aboriginal Australian  
486 children: a population-based study. *The Pediatric infectious disease journal*. 2007;26(3):210-  
487 6.
- 488 15. D'Onise K, Raupach JC. The burden of influenza in healthy children in South  
489 Australia. *The Medical journal of Australia*. 2008;188(9):510-3.

- 490 16. Fathima P, Blyth CC, Lehmann D, Lim FJ, Abdalla T, De Klerk N, et al. The impact  
491 of pneumococcal vaccination on bacterial and viral pneumonia in Western Australian  
492 children: record linkage cohort study of 469589 births, 1996–2012. *Clinical Infectious*  
493 *Diseases*. 2018;66(7):1075-85.
- 494 17. Flint SM, Davis JS, Su JY, Oliver-Landry EP, Rogers BA, Goldstein A, et al.  
495 Disproportionate impact of pandemic (H1N1) 2009 influenza on Indigenous people in the  
496 Top End of Australia's Northern Territory. *Medical Journal of Australia*. 2010;192(10):617-  
497 22.
- 498 18. Goggin LS, Carcione D, Mak DB, Dowse GK, Giele CM, Smith DW, et al. Chronic  
499 disease and hospitalisation for pandemic (H1N1) 2009 influenza in Indigenous and non-  
500 Indigenous Western Australians. *Communicable Diseases Intelligence*. 2011;35(2):172-6.
- 501 19. Harris PN, Dixit R, Francis F, Buettner PG, Leahy C, Burgher B, et al. Pandemic  
502 influenza H1N1 2009 in north Queensland--risk factors for admission in a region with a large  
503 indigenous population. *Communicable Diseases Intelligence*. 2010;34(2):102-9.
- 504 20. Kelly H, Mercer G, Cheng A. Quantifying the risk of pandemic influenza in  
505 pregnancy and indigenous people in Australia in 2009. *Euro surveillance : bulletin Europeen*  
506 *sur les maladies transmissibles = European communicable disease bulletin*. 2009;14(50).
- 507 21. Li-Kim-Moy J, Yin JK, Patel C, Beard FH, Chiu C, Macartney KK, et al. Australian  
508 vaccine preventable disease epidemiological review series: Influenza 2006 to 2015.  
509 *Communicable diseases intelligence quarterly report*. 2016;40(4):E482-e95.
- 510 22. Menzies R, McIntyre P, Beard F. Vaccine preventable diseases and vaccination  
511 coverage in Aboriginal and Torres Strait Islander people, Australia, 1999 to 2002.  
512 *Communicable diseases intelligence quarterly report*. 2004;28(2):127-59.
- 513 23. Menzies R, Turnour C, Chiu C, McIntyre P. Vaccine preventable diseases and  
514 vaccination coverage in Aboriginal and Torres Strait Islander people, Australia 2003 to 2006.  
515 *Communicable diseases intelligence quarterly report*. 2008;32 Suppl:S2-67.
- 516 24. Naidu L, Chiu C, Habig A, Lowbridge C, Jayasinghe S, Wang H, et al. Vaccine  
517 preventable diseases and vaccination coverage in Aboriginal and Torres Strait Islander  
518 people, Australia 2006-2010. *Communicable diseases intelligence quarterly report*. 2013;37  
519 Suppl:S1-95.
- 520 25. New South Wales Public Health Network. Progression and impact of the first winter  
521 wave of the 2009 pandemic H1N1 influenza in New South Wales, Australia.  
522 *Eurosurveillance*. 2009;14(42):19365.
- 523 26. Pennington K, Owen R, Mun J. Annual Report of the National Influenza Surveillance  
524 Scheme, 2009. *Communicable Diseases Intelligence*. 2017;41(4).
- 525 27. Rudge S, Massey PD. Responding to pandemic (H1N1) 2009 influenza in Aboriginal  
526 communities in NSW through collaboration between NSW Health and the Aboriginal  
527 community-controlled health sector. *New South Wales public health bulletin*. 2010;21(1-  
528 2):26-9.

- 529 28. Weinman AL, Sullivan SG, Vijaykrishna D, Markey P, Levy A, Miller A, et al.  
530 Epidemiological trends in notified influenza cases in Australia's Northern Territory,  
531 2007-2016. *Influenza and other respiratory viruses*. 2020;14(5):541-50.
- 532 29. Brooks EG, Bryce CH, Avery C, Smelser C, Thompson D, Nolte KB. 2009 H1N1  
533 Fatalities: The New Mexico Experience. *Journal of Forensic Sciences*. 2012;57(6):1512-8.
- 534 30. Centers for Disease Control and Prevention. Deaths related to 2009 pandemic  
535 influenza A (H1N1) among American Indian/Alaska Natives - 12 states, 2009. *MMWR -*  
536 *Morbidity & Mortality Weekly Report*. 2009;58(48):1341-4.
- 537 31. Chowell G, Ayala A, Berisha V, Viboud C, Schumacher M. Risk factors for mortality  
538 among 2009 A/H1N1 influenza hospitalizations in Maricopa County, Arizona, April 2009 to  
539 March 2010. *Computational and Mathematical Methods in Medicine*. 2012;2012 (no  
540 pagination)(914196).
- 541 32. Dee DL, Bensyl DM, Gindler J, Truman BI, Allen BG, D'Mello T, et al. Racial and  
542 Ethnic Disparities in Hospitalizations and Deaths Associated with 2009 Pandemic Influenza  
543 A (H1N1) Virus Infections in the United States. *Annals of Epidemiology*. 2011;21(8):623-30.
- 544 33. Foote EM, Singleton RJ, Holman RC, Seeman SM, Steiner CA, Bartholomew M, et  
545 al. Lower respiratory tract infection hospitalizations among American Indian/Alaska Native  
546 children and the general United States child population. *International journal of circumpolar*  
547 *health*. 2015;74:29256.
- 548 34. Gounder PP, Callinan LS, Holman RC, Cheng PY, Bruce MG, Redd JT, et al.  
549 Influenza hospitalizations among American Indian/Alaska Native people and in the United  
550 States general population. *Open Forum Infectious Diseases*. 2014;1(1).
- 551 35. Groom AV, Hennessy TW, Singleton RJ, Butler JC, Holve S, Cheek JE. Pneumonia  
552 and Influenza Mortality Among American Indian and Alaska Native People, 1990-2009.  
553 *American Journal of Public Health*. 2014(S3):S460-9.
- 554 36. Hennessy TW, Bruden D, Castrodale L, Komatsu K, Erhart LM, Thompson D, et al.  
555 A case-control study of risk factors for death from 2009 pandemic influenza A(H1N1): is  
556 American Indian racial status an independent risk factor? *Epidemiology & Infection*.  
557 2016;144(2):315-24.
- 558 37. Thompson DL, Jungk J, Hancock E, Smelser C, Landen M, Nichols M, et al. Risk  
559 Factors for 2009 Pandemic Influenza A (H1N1)-Related Hospitalization and Death Among  
560 Racial/Ethnic Groups in New Mexico. *American Journal of Public Health*. 2011;101(9):1776-  
561 84.
- 562 38. Wenger JD, Castrodale LJ, Bruden DL, Keck JW, Zulz T, Bruce MG, et al. 2009  
563 pandemic influenza a H1N1 in Alaska: Temporal and geographic characteristics of spread  
564 and increased risk of hospitalization among Alaska native and Asian/Pacific islander people.  
565 *Clinical Infectious Diseases*. 2011;52(SUPPL. 1):S189-S97.
- 566 39. Baker MG, Wilson N, Huang QS, Paine S, Lopez L, Bandaranayake D, et al.  
567 Pandemic influenza A(H1N1)v in New Zealand: the experience from April to August 2009.  
568 *Euro Surveillance: Bulletin Europeen sur les Maladies Transmissibles = European*  
569 *Communicable Disease Bulletin*. 2009;14(34):27.

- 570 40. Bandaranayake D, Jacobs M, Baker M, Hunt D, Wood T, Bissielo A, et al. The  
571 second wave of 2009 pandemic influenza a(H1N1) in New Zealand, January-October 2010.  
572 Eurosurveillance. 2011;16(6).
- 573 41. Dee S, Jayathissa S. Clinical and epidemiological characteristics of the hospitalised  
574 patients due to pandemic H1N1 2009 viral infection: Experience at Hutt Hospital, New  
575 Zealand. New Zealand Medical Journal. 2010;123(1312):45-53.
- 576 42. Prasad N, Huang QS, Wood T, Aminisani N, McArthur C, Baker MG, et al.  
577 Influenza-associated outcomes among pregnant, postpartum, and nonpregnant women of  
578 reproductive age. The Journal of infectious diseases. 2019;219(12):1893-903.
- 579 43. Prasad N, Trenholme AA, Huang QS, Duque J, Grant CC, Newbern EC. Respiratory  
580 virus-related emergency department visits and hospitalizations among infants in New  
581 Zealand. The Pediatric infectious disease journal. 2020;39(8):e176-e82.
- 582 44. Verrall A, Norton K, Rooker S, Dee S, Olsen L, Tan CE, et al. Hospitalizations for  
583 pandemic (H1N1) 2009 among Maori and Pacific Islanders, New Zealand. Emerging  
584 infectious diseases. 2010;16(1):100-2.
- 585 45. Helferty M, Vachon J, Tarasuk J, Rodin R, Spika J, Pelletier L. Incidence of hospital  
586 admissions and severe outcomes during the first and second waves of pandemic (H1N1)  
587 2009. Cmaj. 2010;182(18):1981-7.
- 588 46. Mostaco-Guidolin LC, Towers SM, Buckeridge DL, Moghadas SM. Age distribution  
589 of infection and hospitalization among Canadian First Nations populations during the 2009  
590 H1N1 pandemic. American journal of public health. 2013;103(2):e39-44.
- 591 47. Rolland-Harris E, Vachon J, Kropp R, Frood J, Morris K, Pelletier L, et al.  
592 Hospitalization of pregnant women with pandemic A(H1N1) 2009 influenza in Canada.  
593 Epidemiology & Infection. 2012;140(7):1316-27.
- 594 48. Zarychanski R, Stuart TL, Kumar A, Doucette S, Elliott L, Kettner J, et al. Correlates  
595 of severe disease in patients with 2009 pandemic influenza (H1N1) virus infection. CMAJ:  
596 Canadian Medical Association Journal. 2010;182(3):257-64.
- 597 49. Lenzi L, de Mello AM, da Silva LR, Grochocki MHC, Pontarolo R. Pandemic  
598 influenza A (H1N1) 2009: Risk factors for hospitalization. Jornal Brasileiro de Pneumologia.  
599 2012;38(1):57-65.
- 600 50. Australian Bureau of Statistics. 2011 Census Quickstats 2017 [cited on: 29/9/2017].  
601 Available from:  
602 [http://www.censusdata.abs.gov.au/census\\_services/getproduct/census/2011/quickstat/5?open](http://www.censusdata.abs.gov.au/census_services/getproduct/census/2011/quickstat/5?open)  
603 [document](#).
- 604 51. Statistics Canada. Aboriginal Peoples in Canada: First Nations People, Métis and  
605 Inuit 2016 [cited on: 28/9/2017]. Available from: [http://www12.statcan.gc.ca/nhs-](http://www12.statcan.gc.ca/nhs-enm/2011/as-sa/99-011-x/99-011-x2011001-eng.cfm)  
606 [enm/2011/as-sa/99-011-x/99-011-x2011001-eng.cfm](http://www12.statcan.gc.ca/nhs-enm/2011/as-sa/99-011-x/99-011-x2011001-eng.cfm).
- 607 52. Instituto Brasileiro De Geografia e Estatística (IBGE). Tendências Demográficas -  
608 Uma análise dos indígenas com base nos resultados da amostra dos Censos Demográficos  
609 1991 e 2000. Rio de Janeiro; 2005.

- 610 53. Australian Bureau of Statistics. 2006 Census QuickStats 2017 [cited on: 31/10/2017].  
611 Available from:  
612 [http://www.censusdata.abs.gov.au/census\\_services/getproduct/census/2006/quickstat/1?open](http://www.censusdata.abs.gov.au/census_services/getproduct/census/2006/quickstat/1?open)  
613 [document](http://www.censusdata.abs.gov.au/census_services/getproduct/census/2006/quickstat/1?open).
- 614 54. Statistics Canada. Selected language characteristics, Aboriginal identity, age groups  
615 and sex for the population of Canada, Provinces, Territories and Census Metropolitan Areas,  
616 2006 Census. Cat no. 97-558-XCB2006016 Ottawa: Statistics Canada; 2008 [Available from:  
617 [https://www12.statcan.gc.ca/census-recensement/2006/dp-pd/tbt/Rp-](https://www12.statcan.gc.ca/census-recensement/2006/dp-pd/tbt/Rp-eng.cfm?LANG=E&APATH=3&DETAIL=1&DIM=0&FL=A&FREE=1&GC=0&GID=0&GK=0&GRP=1&PID=89150&PRID=0&PTYPE=88971&S=0&SHOWALL=No&SUB=0&Temporal=2006&THEME=73&VID=0&VNAMEE=&VNAMEF=)  
618 [eng.cfm?LANG=E&APATH=3&DETAIL=1&DIM=0&FL=A&FREE=1&GC=0&GID=0&](https://www12.statcan.gc.ca/census-recensement/2006/dp-pd/tbt/Rp-eng.cfm?LANG=E&APATH=3&DETAIL=1&DIM=0&FL=A&FREE=1&GC=0&GID=0&GK=0&GRP=1&PID=89150&PRID=0&PTYPE=88971&S=0&SHOWALL=No&SUB=0&Temporal=2006&THEME=73&VID=0&VNAMEE=&VNAMEF=)  
619 [GK=0&GRP=1&PID=89150&PRID=0&PTYPE=88971&S=0&SHOWALL=No&SUB=0&](https://www12.statcan.gc.ca/census-recensement/2006/dp-pd/tbt/Rp-eng.cfm?LANG=E&APATH=3&DETAIL=1&DIM=0&FL=A&FREE=1&GC=0&GID=0&GK=0&GRP=1&PID=89150&PRID=0&PTYPE=88971&S=0&SHOWALL=No&SUB=0&Temporal=2006&THEME=73&VID=0&VNAMEE=&VNAMEF=)  
620 [Temporal=2006&THEME=73&VID=0&VNAMEE=&VNAMEF=](https://www12.statcan.gc.ca/census-recensement/2006/dp-pd/tbt/Rp-eng.cfm?LANG=E&APATH=3&DETAIL=1&DIM=0&FL=A&FREE=1&GC=0&GID=0&GK=0&GRP=1&PID=89150&PRID=0&PTYPE=88971&S=0&SHOWALL=No&SUB=0&Temporal=2006&THEME=73&VID=0&VNAMEE=&VNAMEF=).
- 621 55. U.S. Census Bureau. 2010 Census Interactive Population Search 2011 [cited on:  
622 15/9/2017]. Available from: [http://www12.statcan.gc.ca/census-recensement/2011/rt-](http://www12.statcan.gc.ca/census-recensement/2011/rt-td/index-eng.cfm?TABID=6)  
623 [td/index-eng.cfm?TABID=6](http://www12.statcan.gc.ca/census-recensement/2011/rt-td/index-eng.cfm?TABID=6).
- 624 56. Braveman P, Gruskin S. Defining equity in health. *Journal of Epidemiology and*  
625 *Community Health* 2003;57:254-258.
- 626 57. Reading CL, Wien F. Health inequalities and the social determinants of Aboriginal  
627 peoples' health: National Collaborating Centre for Aboriginal Health Prince George, BC;  
628 2009.
- 629 58. Reid P, Cormack D, Paine SJ. Colonial histories, racism and health—The experience  
630 of Māori and Indigenous peoples. *Public Health*. 2019;172:119-24.
- 631 59. Hamed, S, Bradby, H, Ahlberg, BM *et al*. Racism in healthcare: a scoping  
632 review. *BMC Public Health* 2022;22(1):1-22.
- 633 60. U.S. Census Bureau. We the People: American Indians and Alaska Natives in the  
634 United States 2006 [cited on: 19/10/2017]. Available from:  
635 <https://www.census.gov/content/dam/Census/library/publications/2006/dec/censr-28.pdf>.
- 636 61. Statistics New Zealand. 2013 Census QuickStats about Māori 2013 [cited on:  
637 19/10/2017]. Available from: [http://www.stats.govt.nz/Census/2013-census/profile-and-](http://www.stats.govt.nz/Census/2013-census/profile-and-summary-reports/quickstats-about-maori-english.aspx)  
638 [summary-reports/quickstats-about-maori-english.aspx](http://www.stats.govt.nz/Census/2013-census/profile-and-summary-reports/quickstats-about-maori-english.aspx).
- 639 62. Australian Bureau of Statistics. 2016 Census Data Summary; Aboriginal and Torres  
640 Strait Islander Population 2017 [cited on: 19/10/2017]. Available from:  
641 [http://www.ausstats.abs.gov.au/Ausstats/subscriber.nsf/0/C1DE83F220B089E3CA25814700](http://www.ausstats.abs.gov.au/Ausstats/subscriber.nsf/0/C1DE83F220B089E3CA2581470023C96E/$File/aboriginal%20and%20torres%20strait%20islander%20population,%202016%20census%20data%20summary.pdf)  
642 [23C96E/\\$File/aboriginal%20and%20torres%20strait%20islander%20population,%202016%](http://www.ausstats.abs.gov.au/Ausstats/subscriber.nsf/0/C1DE83F220B089E3CA2581470023C96E/$File/aboriginal%20and%20torres%20strait%20islander%20population,%202016%20census%20data%20summary.pdf)  
643 [20census%20data%20summary.pdf](http://www.ausstats.abs.gov.au/Ausstats/subscriber.nsf/0/C1DE83F220B089E3CA2581470023C96E/$File/aboriginal%20and%20torres%20strait%20islander%20population,%202016%20census%20data%20summary.pdf).
- 644 63. Centers for Disease Control and Prevention. Flu-related hospitalizations and deaths in  
645 the United States from April 2009 - January 30, 2010 [Cited on: 19/10/2017]. Available  
646 from: [https://www.cdc.gov/H1N1flu/hosp\\_deaths\\_ahdra.htm](https://www.cdc.gov/H1N1flu/hosp_deaths_ahdra.htm).
- 647 64. The World Bank. World bank Country and Lending Groups 2017 [cited on:  
648 19/10/2017]. Available from:  
649 <https://datahelpdesk.worldbank.org/knowledgebase/articles/906519>.

650 65. Simon P. Collecting ethnic statistics in Europe: a review. *Ethnic and Racial Studies*.  
651 2012;35(8):1366-91.

652 66. World Health Organization Commission on Social Determinants of Health. Closing  
653 the gap in a generation: health equity through action on the social determinants of health:  
654 Commission on Social Determinants of Health final report: World Health Organization;  
655 2008.

656



**Figure 1. Flow diagram of included studies**

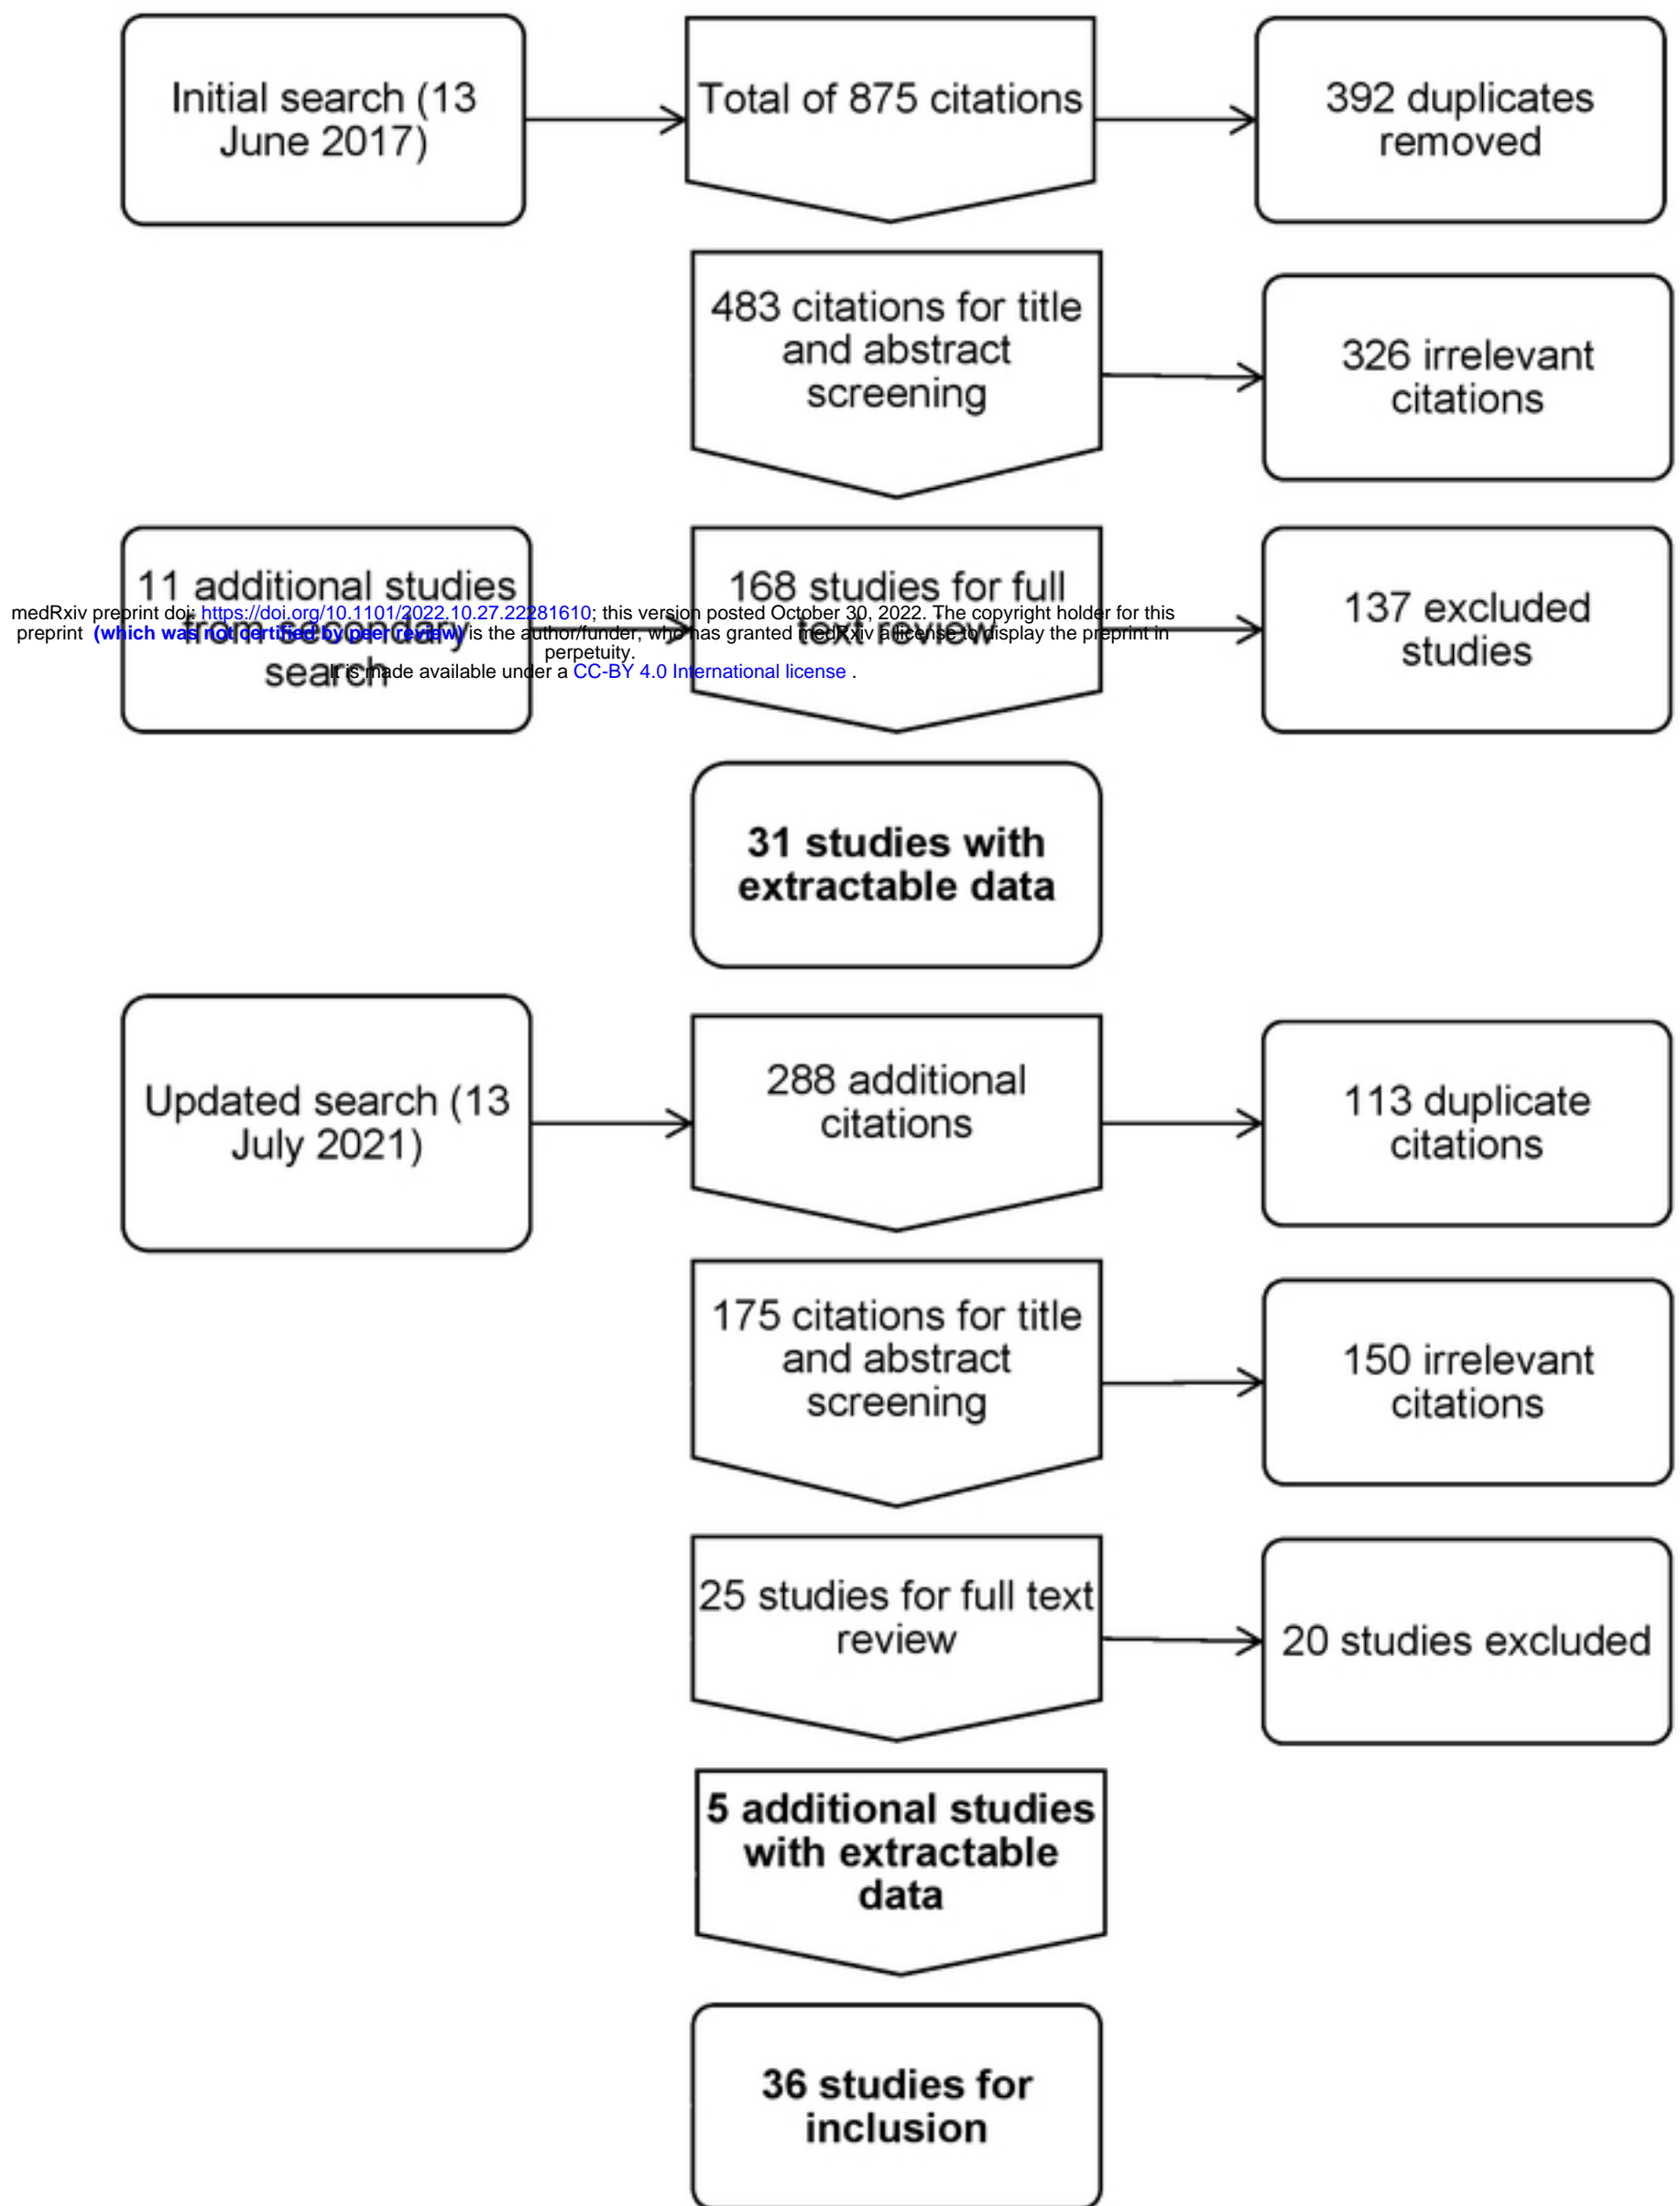

Figure 1

**Figure 2: Overall influenza-associated hospitalisation rate ratios (HRR) for Indigenous populations compared with a benchmark population by country**

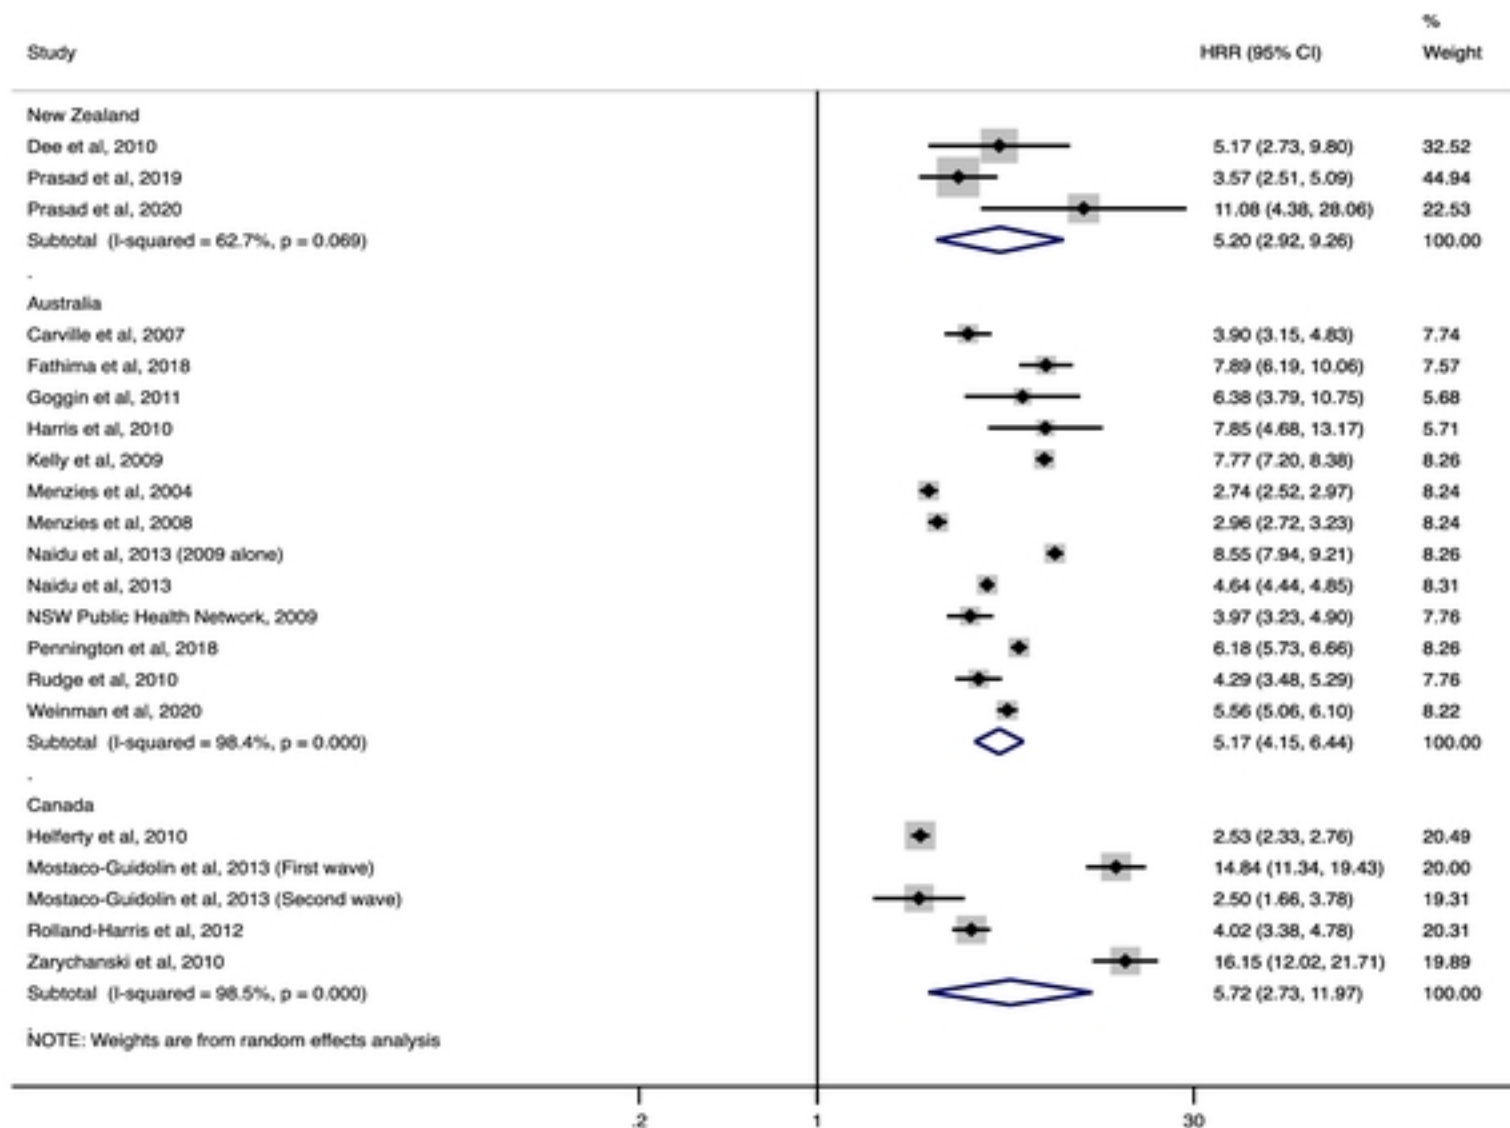

Figure 2

**Figure 3: Seasonal and pandemic influenza-associated hospitalisation rate ratios (HRR) from Australian studies for Indigenous populations compared with a benchmark population**

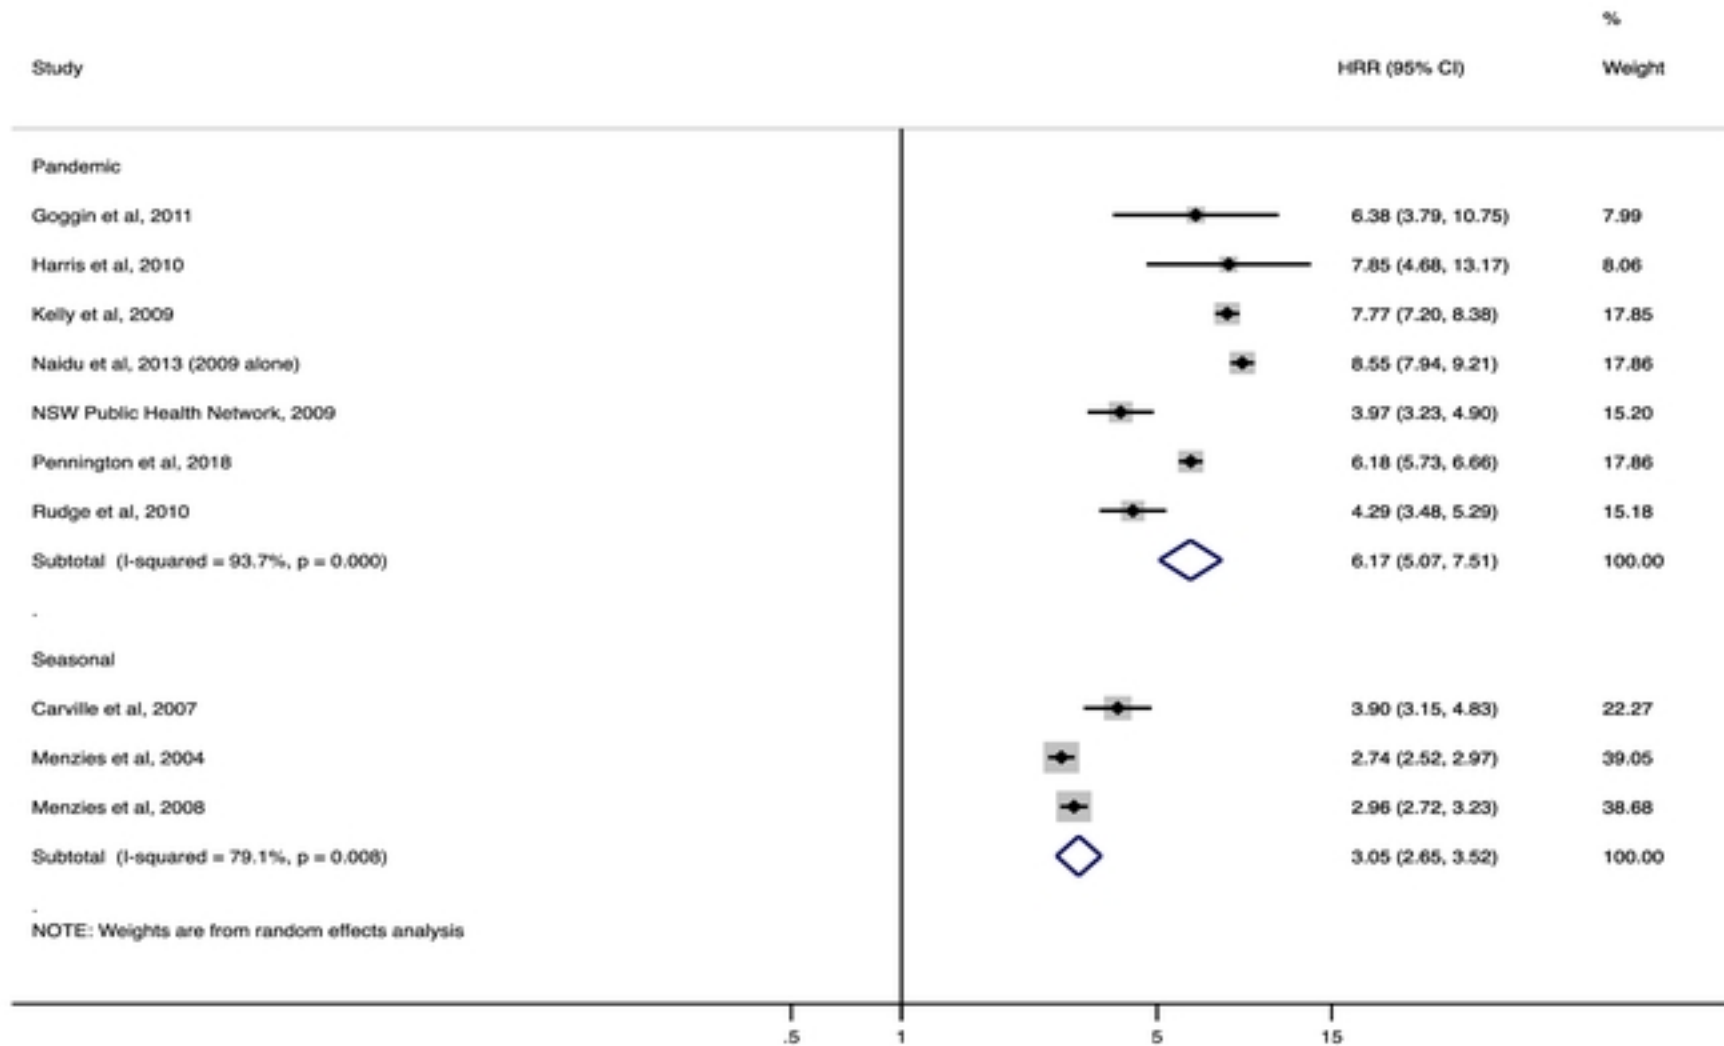

Figure 3

**Figure 4: Overall influenza-associated mortality rate ratios (MRR) by country for Indigenous peoples compared with a benchmark population**

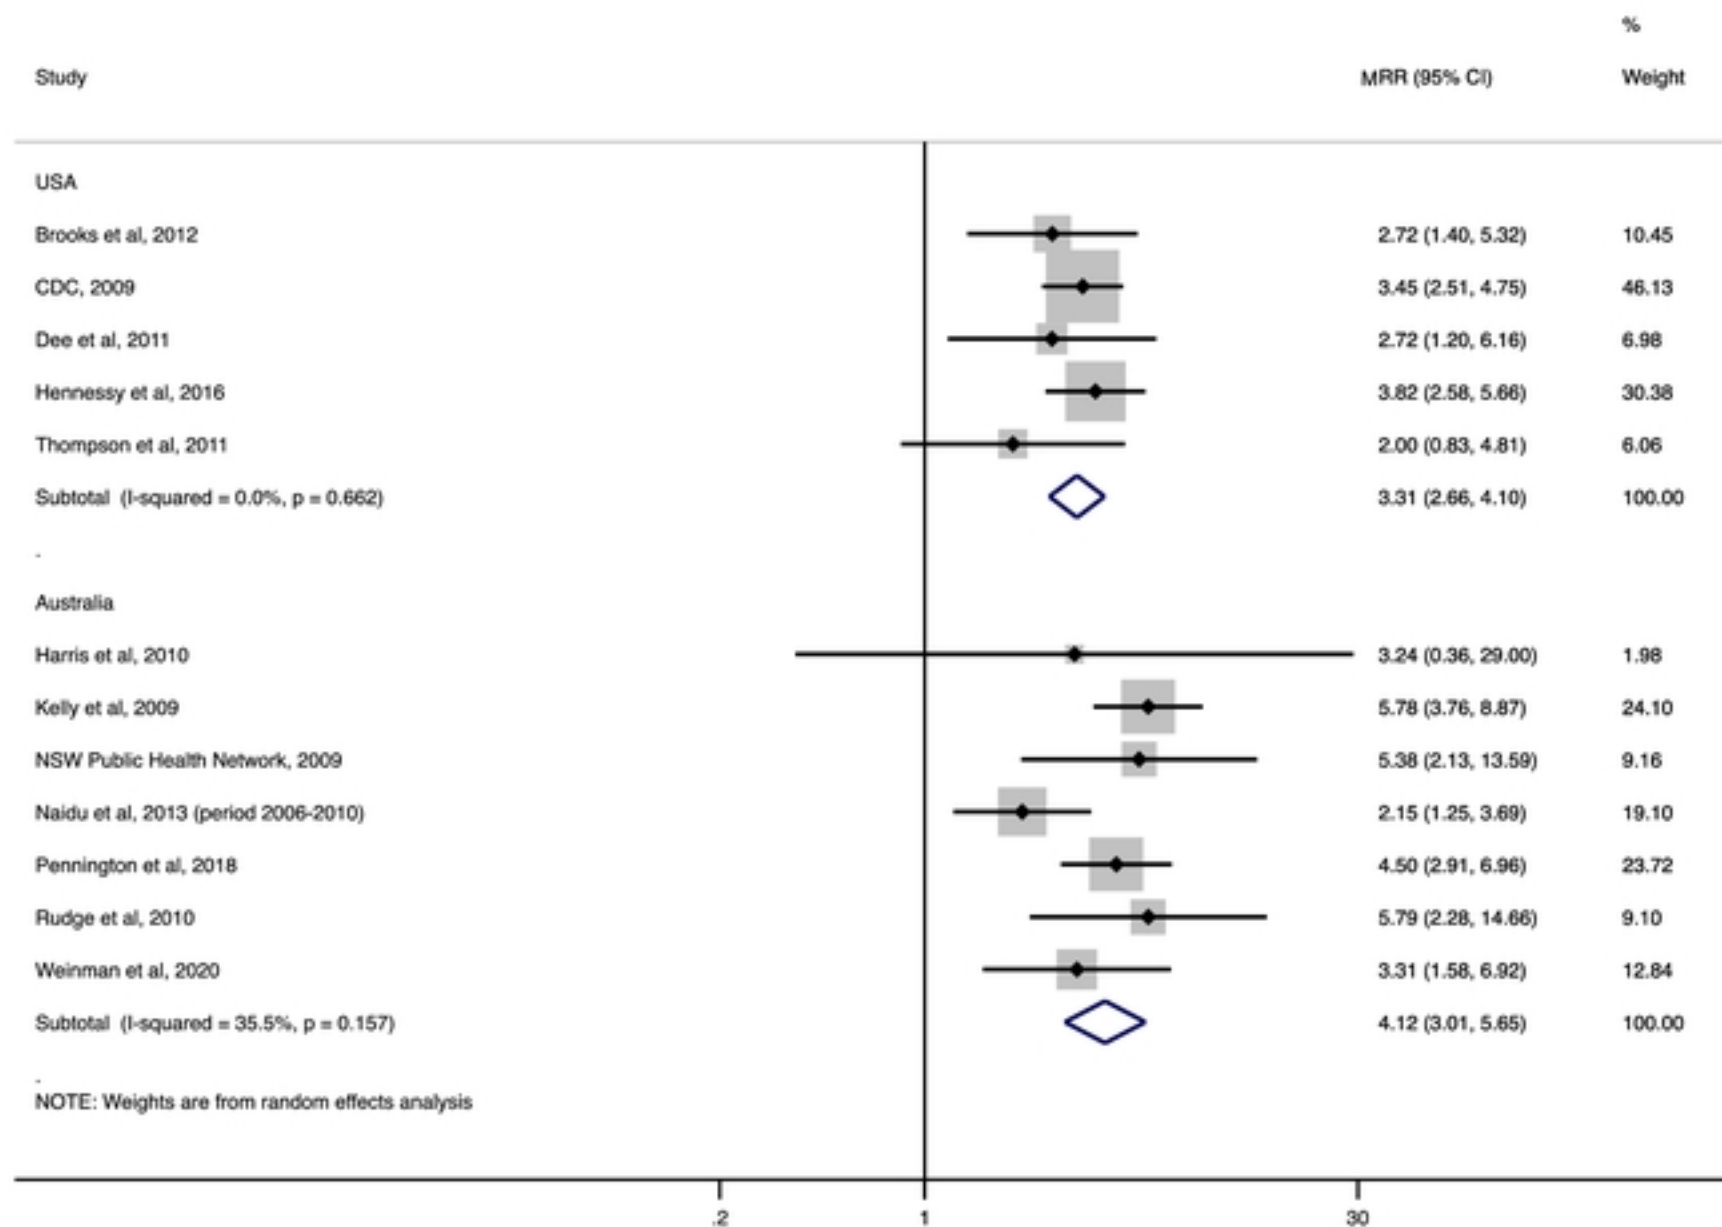

Figure 4
